# Supplementary material for: Protection against SARS-CoV-2 Omicron BA.1 variant challenge in macaques by prime-boost vaccination with Ad26.COV2.S and SpFN
Source: PubMed Central journal article supplement (PMC9683731; doi:10.1126/sciadv.ade4433), 2022-11-23
Supplement: sciadv.ade4433_sm.pdf [file sciadv.ade4433_sm.pdf]

Supplementary Materials for  
**Protection against SARS-CoV-2 Omicron BA.1 variant challenge in  
macaques by prime-boost vaccination with Ad26.COV2.S and SpFN**

Jingyou Yu *et al.*

Corresponding author: M. Gordon Joyce, [gjoyce@eidresearch.org](mailto:gjoyce@eidresearch.org); Dan H. Barouch, [dbarouch@bidmc.harvard.edu](mailto:dbarouch@bidmc.harvard.edu)

*Sci. Adv.* **8**, eade4433 (2022)  
DOI: 10.1126/sciadv.ade4433

**This PDF file includes:**

Fig. S1

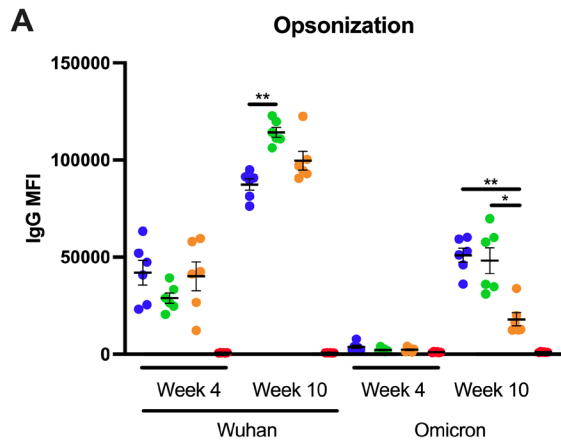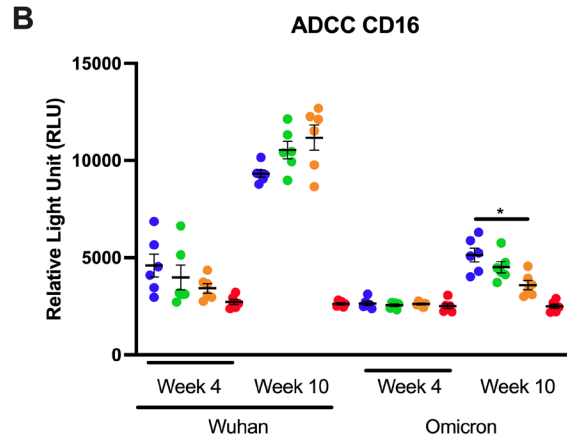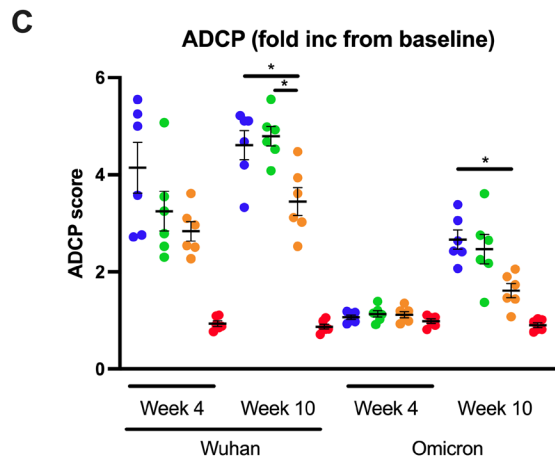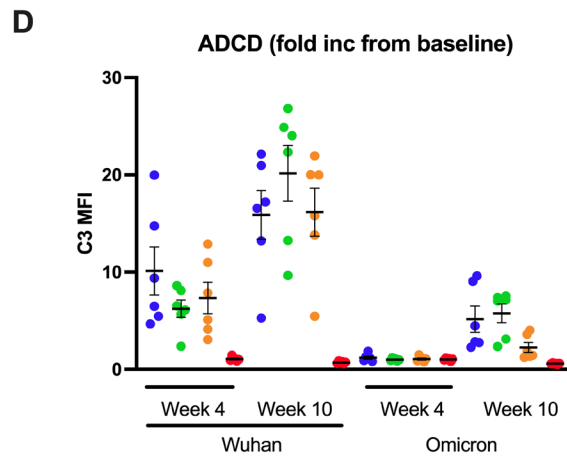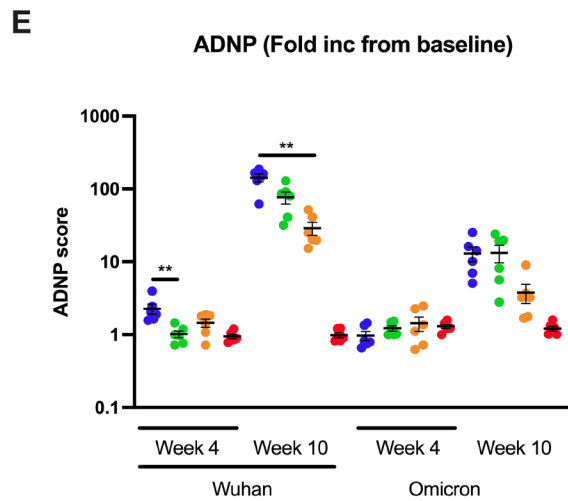

## Supplementary Figure Legends

**Fig. S1. Fc-effector functions following vaccination.** (A) Opsonization, (B), antibody-dependent cellular toxicity (ADCC), (C) antibody-dependent cellular phagocytosis (ADCP), (D) antibody-dependent complement deposition (ADCD), and (E) antibody-dependent neutrophil phagocytosis (ADNP) measured at weeks 4 and 10 against the prototype Wuhan and Omicron BA.1 variants for SpFN/SpFN (blue), Ad26/SpFN (green), Ad26/Ad26 (orange), Sham/Sham (red). \* $p < 0.05$ , \*\* $p < 0.01$ , \*\*\* $p < 0.001$ , and \*\*\*\* $p < 0.0001$ .
